# Supplementary material for: Comprehending crystalline β-carotene accumulation by comparing engineered cell models and the natural carotenoid-rich system of citrus
Source: PubMed Central journal article supplement — J Exp Bot. 2012 May 18;63(12):4403–17. doi: 10.1093/jxb/ers115 (PMC3421982; doi:10.1093/jxb/ers115), 2012-05-18
Supplement: supp_ers115_00075879-file001.pdf [file supp_ers115_00075879-file001.pdf]

**Comprehending crystalline  $\beta$ -carotene accumulation by comparing  
engineered cell models and natural carotenoid-rich system of citrus**

*Hongbo Cao, Jiancheng Zhang, Jidi Xu, Junli Ye, Ze Yun, Qiang Xu, Juan Xu,  
and Xiuxin Deng*

**Supplementary Material**

## Supplementary data

**Table S1.** Primers used in this study

| Overexpression construct              |                                               |
|---------------------------------------|-----------------------------------------------|
| <i>CrtB</i>                           | Forward: 5'-GTAAAGTGCATGGCTGTTGGCTCGAA-3'     |
|                                       | Reverse: 5'-CGCGGATCCCTAAATCGGGCGCTGCCAGAG-3' |
| <i>tp-rbcS</i>                        | Forward: 5'-CCGCTCGAGATGGCTTCTATGATATCCTC-3'  |
|                                       | Reverse: 5'-AACAGCCATGCACTTTACTCTTCCAC-3'     |
| <i>tp-rbcS-CrtB</i>                   | Forward: 5'-CCGCTCGAGATGGCTTCTATGATATCCTC-3'  |
|                                       | Reverse: 5'-CGCGGATCCCTAAATCGGGCGCTGCCAGAG-3' |
| Probes used in Southern blot analysis |                                               |
| <i>CrtB-S</i>                         | Forward: 5'-ATAAACCTGCTTCGCTGTGGC-3'          |
|                                       | Reverse: 5'-ATTCCCAGTGAAGAAGGTCAACAC-3'       |
| Generation of anti-CrtB antibodies    |                                               |
| <i>CrtB-A</i>                         | Forward: 5'-ATCGAATTCGTGGGTCGTTGTTATCTGC-3'   |
|                                       | Reverse: 5'-ATCCTCGAGTTACGGATGAGGCCGCATC-3'   |

**Table S2.** Specific primers used in real-time reverse transcriptase-PCR

| Gene detected | Sequence                                     | Accession NO. |
|---------------|----------------------------------------------|---------------|
| <i>DXS</i>    | Forward: 5'-CTCTTCCTTCGCCGTTTCC-3'           | EY664196      |
|               | Reverse: 5'-CAGACCAGCGGCAAAAGTAAC-3'         |               |
| <i>DXR</i>    | Forward: 5'-CGATTCTGCTACCCTTTTCAAC-3'        | EY705355      |
|               | Reverse: 5'-ATTGAGTGTATGATAGACTGTGGATG-3'    |               |
| <i>HDS</i>    | Forward: 5'-GGTCGGATGAAATCTGCTAT-3'          | DY268645      |
|               | Reverse: 5'-TTCTGGTGGTCCGTAAGTG-3'           |               |
| <i>HDR</i>    | Forward: 5'-TCTCTTGAAGGTGTGAGGTATTGC-3'      | CB293311      |
|               | Reverse: 5'-GTTACACAAGAGCGACAAGATGC-3'       |               |
| <i>IPI</i>    | Forward: 5'-GGTGAGGAATGCTGCACAAAG-3'         | EY702410      |
|               | Reverse: 5'-AACTCATCAACTGGCACATCTTC-3'       |               |
| <i>GGPPS</i>  | Forward: 5'-TAGAGTTCCCTCAGTTACGCACAG-3'      | AJ243739      |
|               | Reverse: 5'-GCCAGTTCTCTTGTCTTTTGTATCC-3'     |               |
| <i>PSY</i>    | Forward: 5'-CCCGGACTGCTGTGTTAAT-3'           | DQ235260      |
|               | Reverse: 5'-GAGCAAGGATGCCTCAAATC-3'          |               |
| <i>PDS</i>    | Forward: 5'-ATAATTGGCGGACAGGCATA-3'          | AJ319760      |
|               | Reverse: 5'-CCTCTGTCGTCACCTCGATCA-3'         |               |
| <i>ZDS</i>    | Forward: 5'-ATCAGTGCTCGTTGTATGCTTACTATATT-3' | AJ319762      |
|               | Reverse: 5'-CCCTTGAGCATCCGCAAT-3'            |               |
| <i>CRTISO</i> | Forward: 5'-TTCTTTCCATTACATGGGTGTT-3'        | AY655751      |
|               | Reverse: 5'-TCATCCTCAAGCACAAAATGGT-3'        |               |
| <i>LCYE</i>   | Forward: 5'-CAACTGGATATTGAGGGCATCA-3'        | AY533827      |
|               | Reverse: 5'-CAAGGAAACCGTGCCACATC-3'          |               |
| <i>LCYB1</i>  | Forward: 5'-GGCTATATGGTGGCAAGGACTT-3'        | AY679168      |
|               | Reverse: 5'-CAGAATTGAGGCTTCGAACGA-3'         |               |
| <i>LCYB2</i>  | Forward: 5'-TGGCTCAACCAGGATGATCA-3'          | FJ516403      |
|               | Reverse: 5'-TTGGCCACAACCCATTCC-3'            |               |
| <i>HYD</i>    | Forward: 5'-TTTGGGATGGCCTACATGTTTC-3'        | AB114661      |
|               | Reverse: 5'-GGCACGTCGGCAATGG-3'              |               |
| <i>ZEP</i>    | Forward: 5'-GAAGCAATTCTTCGACGTGACA-3'        | AB114662      |
|               | Reverse: 5'-ACCGAGTCCCAAGCAAAGT-3'           |               |
| <i>NCED2</i>  | Forward: 5'-GCCCAACAATCCTTGAAAGTAGA-3'       | AB219171      |
|               | Reverse: 5'-GGGTAAGGCTGTTTAGGGAAATG-3'       |               |
| <i>NCED3</i>  | Forward: 5'-TCTCTTCAAACACCTTCCATTCC-3'       | AB219177      |
|               | Reverse: 5'-GCTGCAGGTGATGGAGGGTAT-3'         |               |
| <i>CCD1</i>   | Forward: 5'-GGAGGATGAAGTGGTTCTGATCA-3'       | AB219165      |
|               | Reverse: 5'-ACAGCCCATTGACCATGTC-3'           |               |
| <i>CCD4a</i>  | Forward: 5'-AACCGAACGTGCCCATTT-3'            | DQ309330      |
|               | Reverse: 5'-TGTCTACGAACACCGCATACTT-3'        |               |
| <i>CCD4b</i>  | Forward: 5'-AAGTGATGCCGAGATGAAGTGGT-3'       | DQ309331      |
|               | Reverse: 5'-GATGTAGCATTTGTCTGCACTAAGAA-3'    |               |
| <i>Actin</i>  | Forward: 5'-CCAAGCAGCATGAAGATCAA-3'          | GU911361      |
|               | Reverse: 5'-ATCTGCTGGAAGGTGCTGAG-3'          |               |

**Table S3.** Analysis of carotenoid profiles detected in the wild-type and ECM lines

| Peak No. | R <sub>t</sub> (min) | λ <sub>max</sub> (nm) | Peak ratio | Carotenoid type               | Wild type | 35S::CrtB |
|----------|----------------------|-----------------------|------------|-------------------------------|-----------|-----------|
| 1        | 5.35                 | 416.5, 440.6, 469.7   | 91         | Violaxanthin                  | a b c d   | A B C D   |
| 2        | 6.28                 | 412.9, 437.0, 466.1   | 96         | 9- <i>cis</i> -violaxanthin   | a c d     | A C D     |
| 3        | 6.84                 | 399.6, 422.5, 449.1   | 99         | Luteoxanthin                  | a b c d   | A B C D   |
| 4        | 7.99                 | 412.9, 438.2, 464.9   | 91         | 9- <i>cis</i> -violaxanthin   | a b c d   | A B C D   |
| 5        | 8.42                 | 421.3, 449.1, 478.2   | 98         | Antheraxanthin                | a b c d   | A B C D   |
| 6        | 9.66                 | 394.8, 420.1, 445.5   | 119        | Unknown                       | a d       | A B D     |
| 7        | 10.90                | 424.3, 446.7, 474.5   | 63         | Lutein                        | a b c d   | A B C D   |
| 8        | 14.50                | 424.3, 450.3, 479.4   | 35         | Zeaxanthin                    | a b d     | A B C D   |
| 9        | 15.73                | 417.7, 443.1, 470.9   | 100        | Unknown                       |           | B         |
| 10       | 16.80                | 423.0, 445.5, 474.5   | 79         | Unknown                       |           | B C       |
| 11       | 18.36                | 427.0, 447.9, 474.5   | 14         | Unknown                       |           | A B C     |
| 12       | 18.90                | 287.5                 | NA         | All- <i>trans</i> -phytoene   | a b c d   | A B C D   |
| 13       | 19.20                | 332.7, 348.3, 365.9   | 71         | Phytofluene a                 | a b c d   | A B C D   |
| 14       | 19.50                | 426.5, 447.9, 474.5   | 58         | α-cryptoxanthin               |           | A B C D   |
| 15       | 20.83                | 416.8, 443.1, 466.1   | 55         | Unknown                       |           | A B       |
| 16       | 21.27                | 443.1, 468.5          | 50         | Unknown                       |           | A B C D   |
| 17       | 21.86                | 332.7, 349.5, 365.9   | 92         | Phytofluene b                 | a b c d   | A B C D   |
| 18       | 22.52                | 450.3, 475.8          | 31         | β-cryptoxanthin               |           | A B C D   |
| 19       | 24.70                | 339.9, 446.7, 472.1   | NA         | Unknown                       | a c d     | A B C D   |
| 20       | 26.30                | 424.4, 447.9, 475.8   | 55         | α-carotene                    | a b c d   | A B C D   |
| 21       | 28.51                | 380.4, 402.0, 426.1   | 121        | All- <i>trans</i> -ε-carotene |           | A B C D   |
| 22       | 30.04                | 428.0, 455.2, 480.6   | 23         | β-carotene                    | a b c d   | A B C D   |
| 23       | 31.26                | 426.1, 447.9, 473.3   | 33         | <i>cis</i> -β-carotene        | a b c d   | A B C D   |
| 24       | 32.93                | 438.0, 463.6, 489.1   | 18         | δ-carotene                    |           | B C D     |
| 25       | 36.75                | 433.5, 457.6, 489.1   | 73         | δ-carotene                    | a c       | A B C     |
| 26       | 37.20                | 437.8, 460.0, 489.1   | 61         | Unknown                       |           | A B       |
| 27       | 39.35                | 440.6, 467.3, 497.6   | 43         | γ-carotene                    |           | A B C     |
| 28       | 41.09                | 440.1, 463.6, 494.0   | 42         | <i>cis</i> -lycopene          | a b c     | A B C     |
| 29       | 41.67                | 438.6, 463.6, 494.0   | 64         | <i>cis</i> -lycopene          |           | A B C     |
| 30       | 53.14                | 446.7, 473.3, 504.9   | 76         | Lycopene                      |           | A B       |

The peak numbers are the same as those in Figure 3. R<sub>t</sub> = retention time. Peak ratio is the percentage III/II for carotenoids. a/A, Marsh grapefruit (M); b/B, Star Ruby grapefruit (RB); c/C, Cara Cara sweet orange (HQC); d/D, Sunburst mandarin (SBT), they represent the occurrence of each carotenoid type in four varieties. The carotenoids were identified by their characteristic absorption spectra and typical retention time based on the literatures (Fraser *et al.*, 2007; Lee, 2001; Liu *et al.*, 2007; Xu *et al.*, 2006) and standards of the CaroNature Co. (Bern, Switzerland).

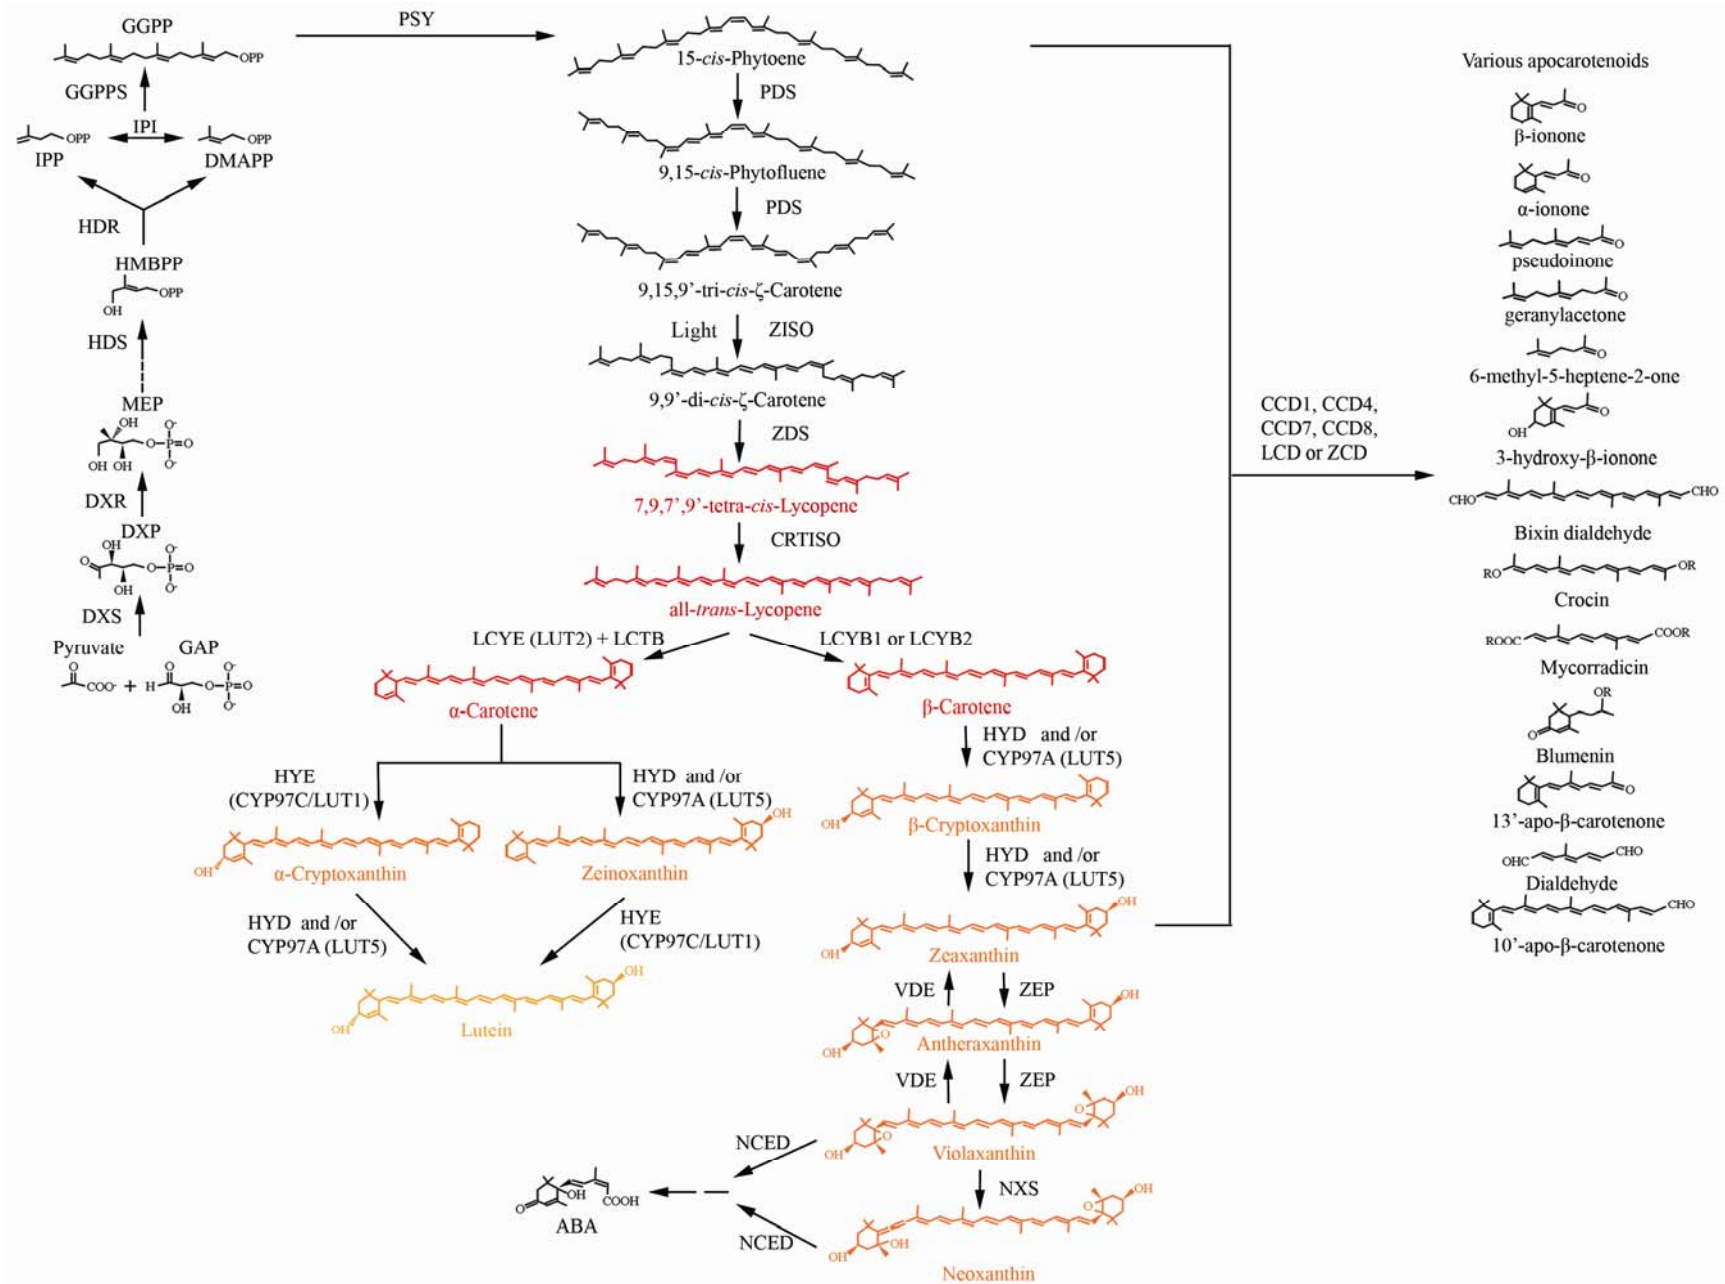

**Figure S1.** Carotenoid biosynthesis pathway in higher plants.

GAP, glyceraldehyde 3-phosphate; DXP, 1-deoxy-D-xylulose 5-phosphate; MEP, 2-C-methyl-derythritol 4-phosphate; HMBPP, 4-hydroxy-2-methylbut-2-enyl 1-phosphate; IPP, isopentenyl diphosphate; DMAPP, dimethylallyl diphosphate; DXS, 1-deoxy-D-xylulose 5-phosphate synthase; DXR, 1-deoxy-D-xylulose 5-phosphate reductoisomerase; HDS, hydroxymethylbutenyl 4-diphosphate synthase; HDR, hydroxymethylbutenyl 4-diphosphate reductase; IPI, isopentenyl diphosphate isomerase; GGPPS, geranylgeranyl diphosphate synthase; PSY, phytoene synthase; PDS, phytoene desaturase; Z-ISO, 15-*cis*- $\zeta$ -carotene isomerase; CRTISO, carotene isomerase; ZDS,  $\zeta$ -carotene desaturase; LCYB1, lycopene  $\beta$ -cyclase 1; LCYB2, lycopene  $\beta$ -cyclase 2; LCYE (LUT2), lycopene  $\epsilon$ -cyclase; HYD,  $\beta$ -carotene hydroxylase (non-heme di-iron group); CPY97A (LUT5),  $\beta$ -carotene hydroxylase (cytochrome P450 monooxygenase group); HYE (CPY97C/LUT1), carotene  $\epsilon$ -ring hydroxylase (cytochrome P450 monooxygenase group); ZEP, zeaxanthin epoxidase; VDE, violaxanthin de-epoxidase; CCD1, -4, -7 and -8, carotenoid cleavage dioxygenase 1, 4, 7, and 8; ZCD, zeaxanthin cleavage dioxygenase; LCD, lycopene cleavage dioxygenase; NCED, 9-*cis*-epoxycarotenoid dioxygenase; NXS, neoxanthin synthase. This carotenoid biosynthesis pathway in higher plants was made based on the literatures (Cazzonelli and Pogson, 2010; Chen *et al.*, 2010; Farré *et al.*, 2011; Vallabhaneni *et al.*, 2010; Yu *et al.*, 2011; Zhu *et al.*, 2010).

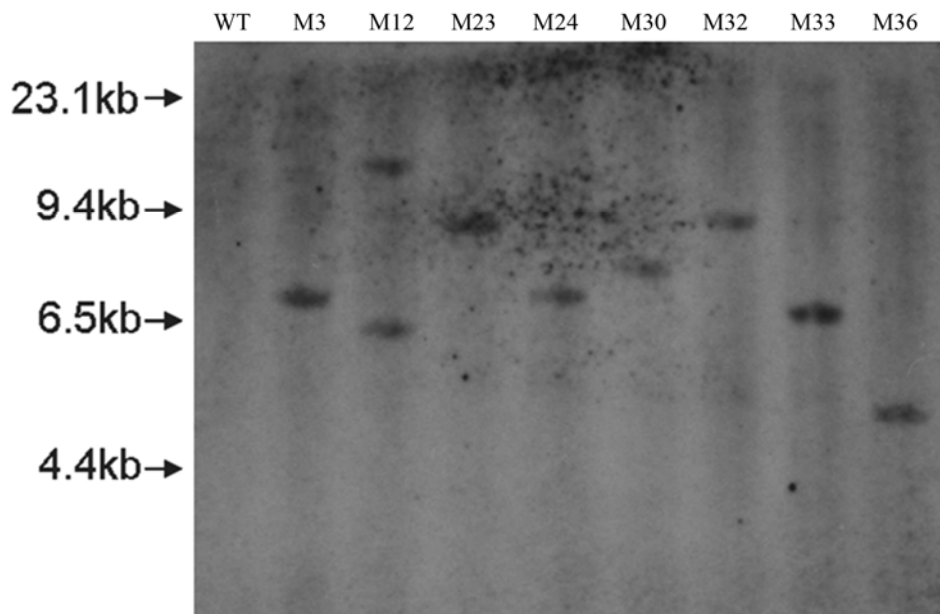

**Figure S2.** A DNA gel blot analysis indicating inserted patterns of T-DNA in the representative lines. Extensive single-copy insertion confirms the occurrence of credible independent transformation events in each tested line.

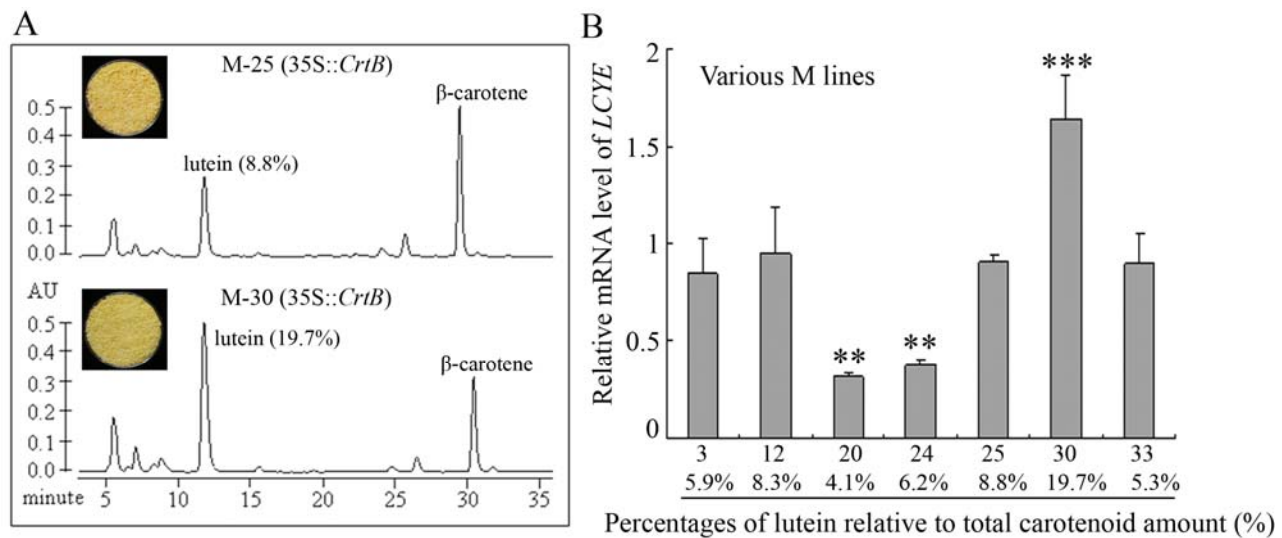

**Figure S3.** A novel 35S::*CrtB* ECM (M-30) containing a high proportion of lutein due to the highest expression of *LCYE* gene. The transcript level is expressed relative to wild type. Repeated experiments were performed. Values are means  $\pm$  SD from three technical replicates of a representative experiment. \*\* and \*\*\* indicate the values are significantly different at significance level of  $P < 0.01$  and  $P < 0.001$ , respectively.



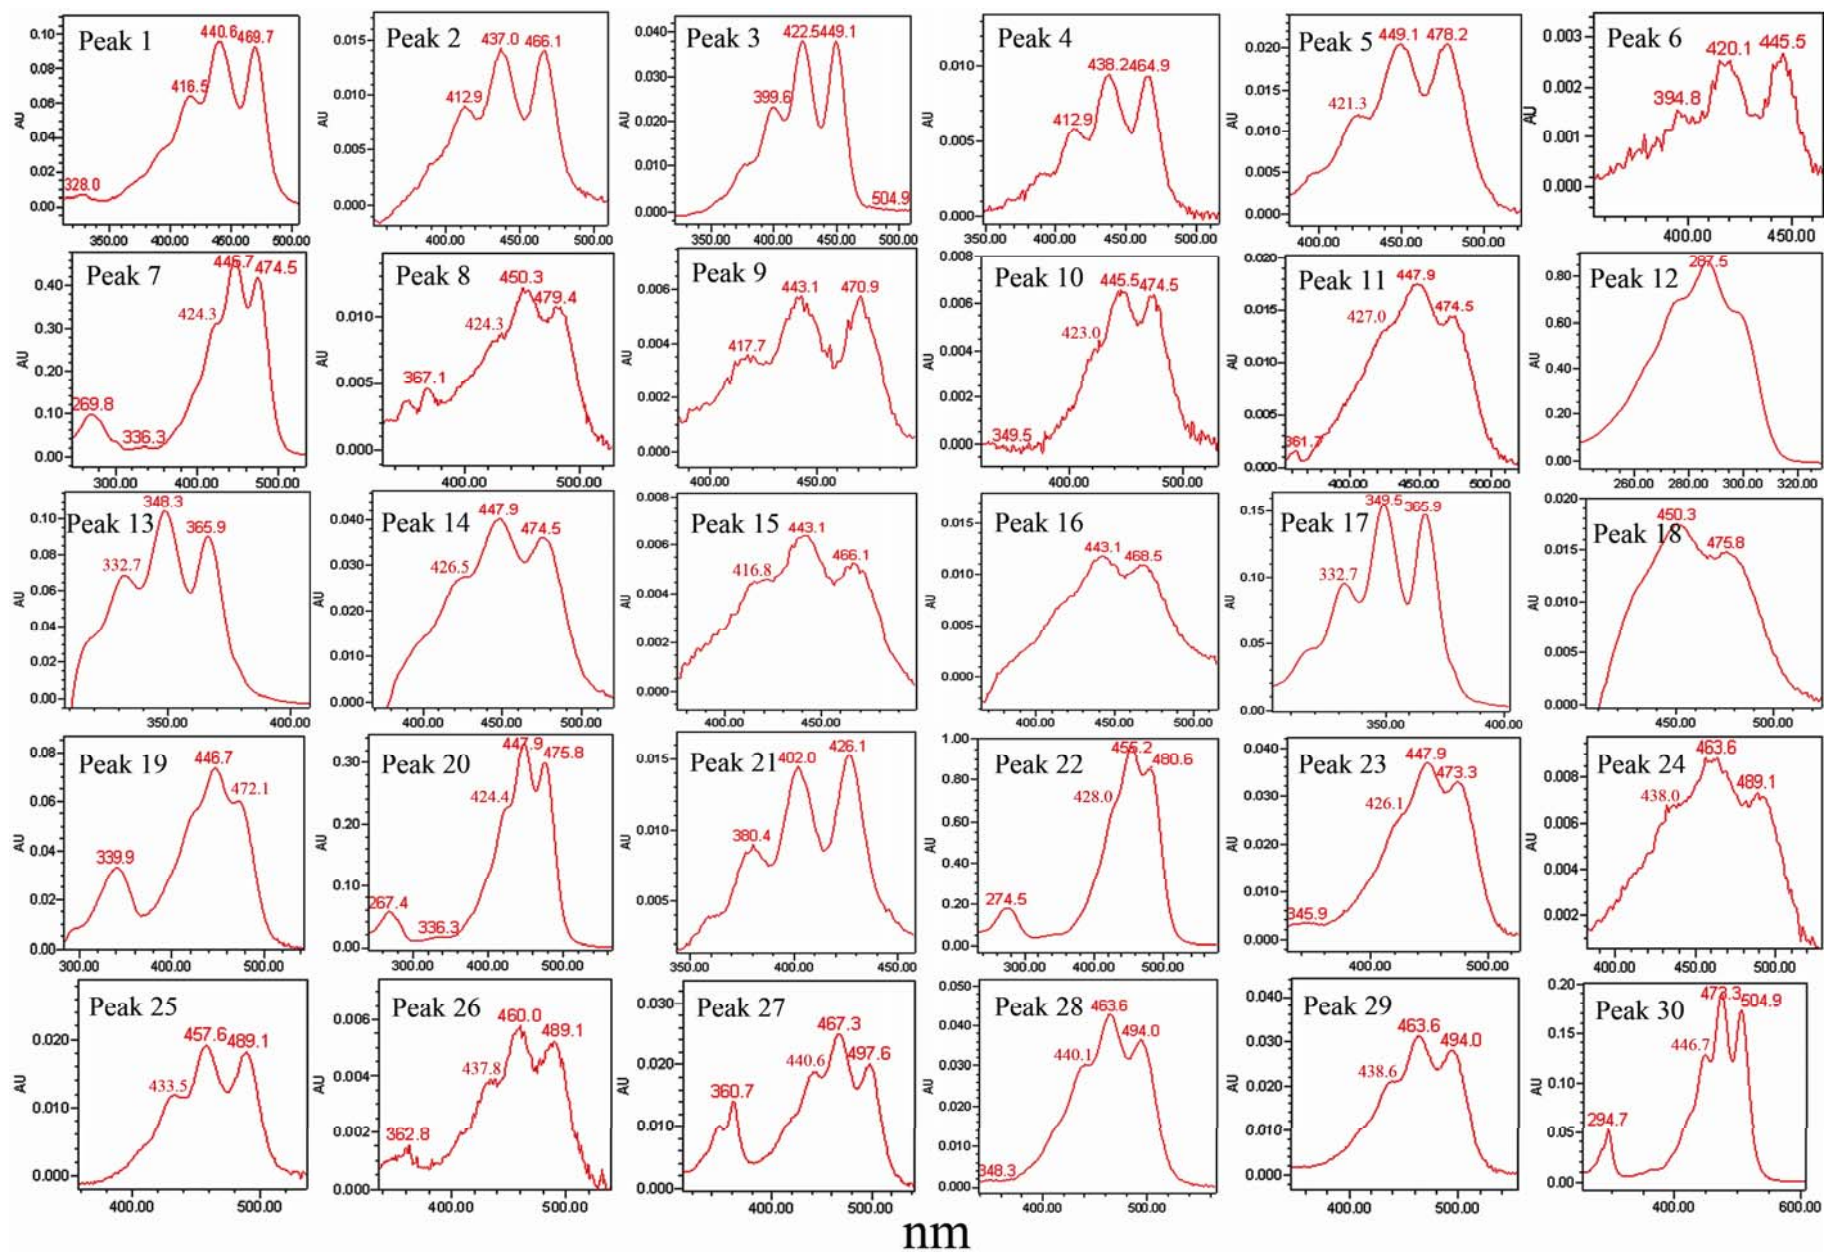

**Figure S4.** Absorbance spectra of the peaks detected in the ECMs (peak identification in Table S3).

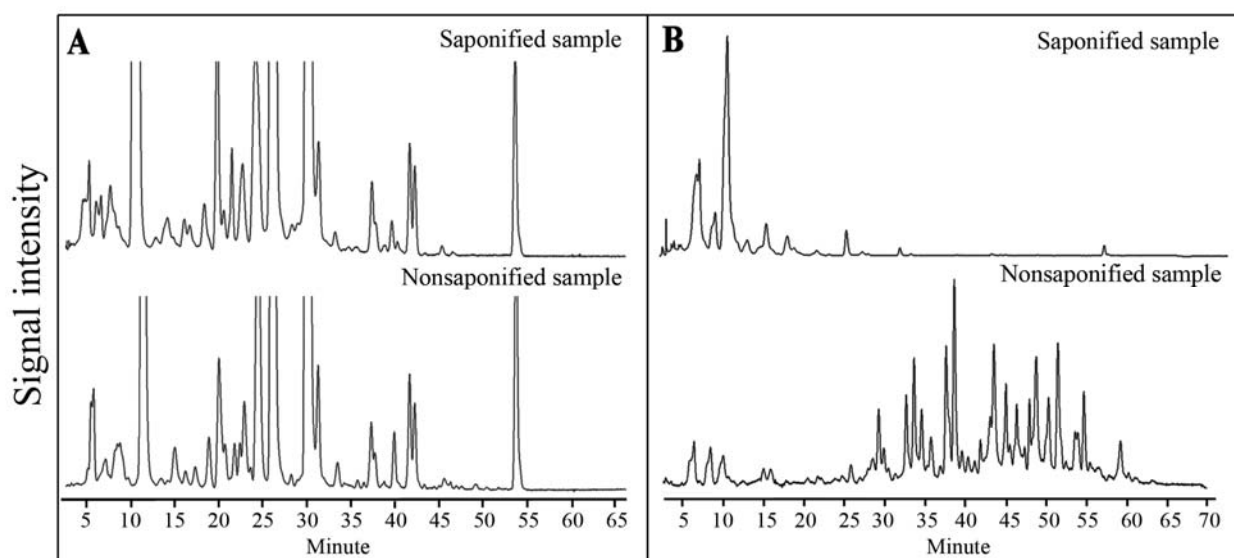

**Figure S5.** HPLC chromatogram of carotenoids extracted from the RB ECM (A) and HQC flavedo (B) at 450 nm. Comparative analysis of saponified and non-saponified samples shows that free-type carotenoids are the major components of the ECMs, while the esterified forms are predominant in the flavedo.

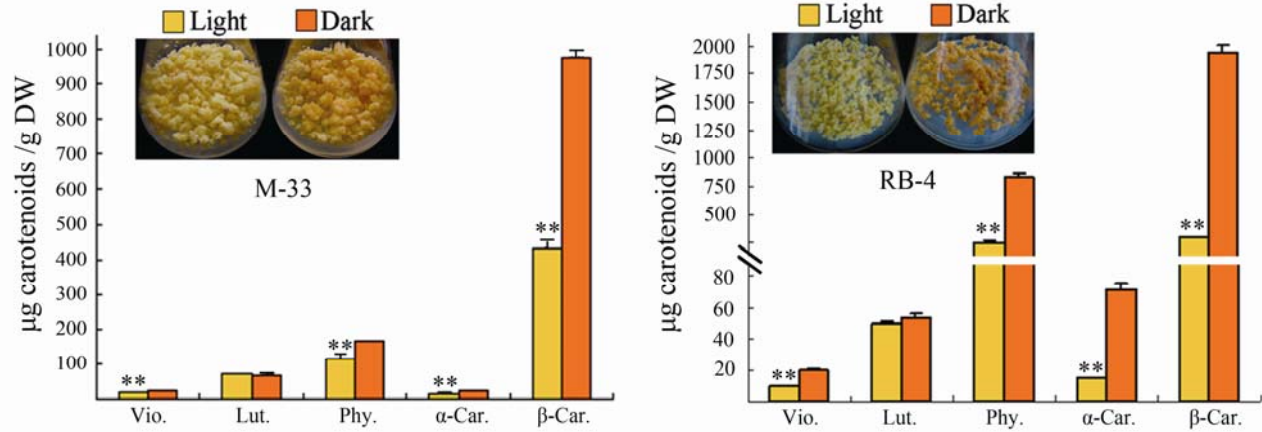

**Figure S6.** Comparative analysis of carotenoids contents in light/dark grown engineered lines. Via. violaxanthin; Lut. lutein; Phy. phytoene;  $\alpha$ -car.  $\alpha$ -carotene;  $\beta$ -car.  $\beta$ -carotene. Columns and bars represent the means and  $\pm$  SD ( $n = 3$  replicate experiments for M and  $n = 2$  replicate experiments for RB), respectively. \*\* indicates that the values are significantly different compared with dark-grown lines at the significant levels of  $P < 0.01$ .

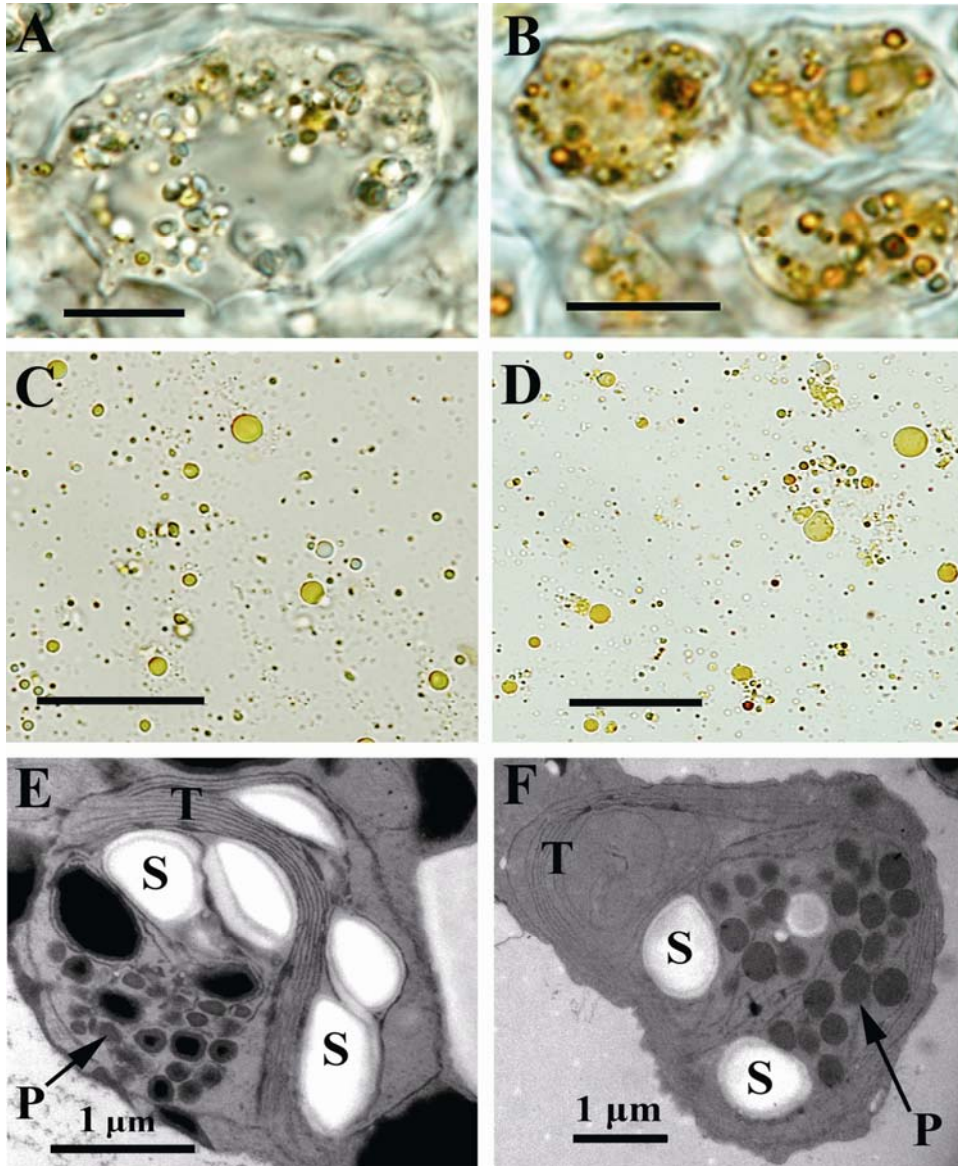

**Figure S7.** Additional photos of the visual inspections of the flavedo cells and plastid isolation. A, Cara Cara navel orange (HQC); B, Sunburst mandarin orange (SBT); C and D, Globular chromoplasts obtained using a protocol for isolating the plastids from the fresh flavedo cells of HQC and SBT, respectively; E and F, Ultrastructure of the chromoplast in the flavedo cells of HQC and SBT, respectively. The bar in A, B, C, D represents 10  $\mu\text{m}$ . S, starch granule; P, plastoglobule; T, remnant thylakoids.

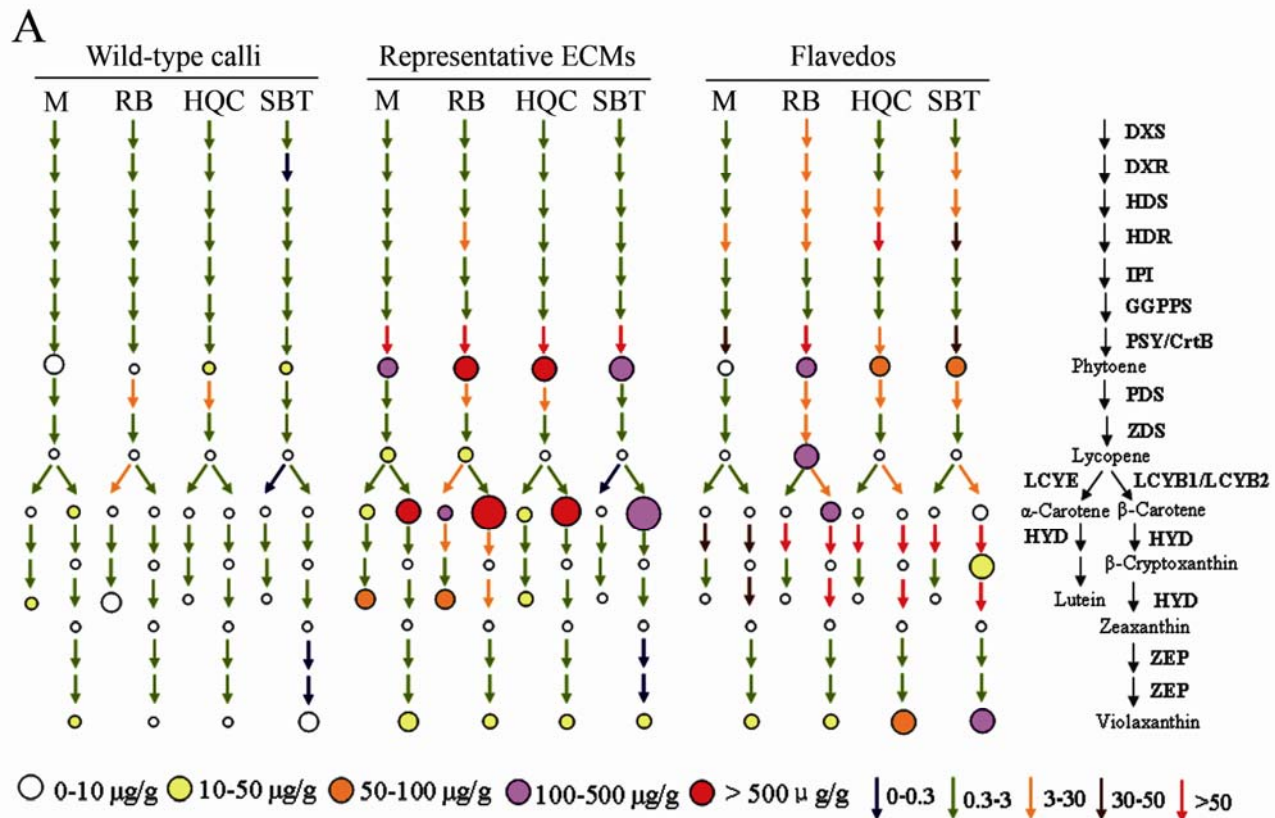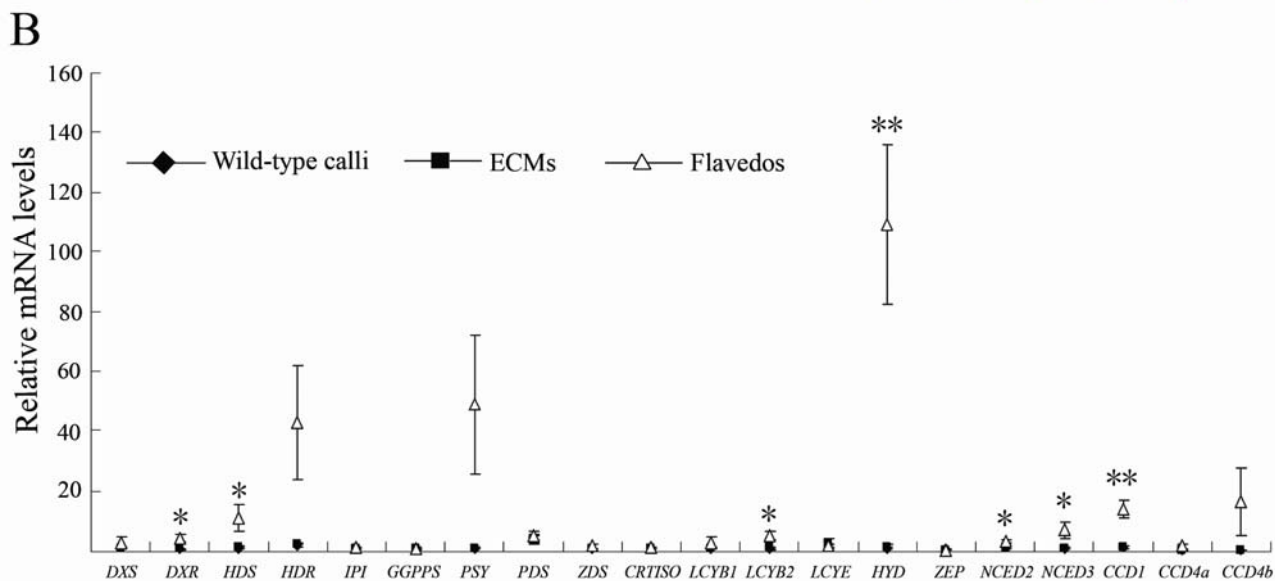

**Figure S8.** Comparative transcriptional analysis of genes encoding enzymes for isoprenoid and carotenoid metabolism among wild-type calli, ECMs and flavedos. (A) A brief schematic representation shows the relationship between transcript levels and carotenoid metabolites. The pathway related carotenoid biosynthesis (right) just shows the tested nodes in the present study. The transcript levels in wild-type M callus are assigned a value of 1 for reference. Carotenoid content is symbolized by a circle, and the size and color of the circle are proportional to the quantity of each carotenoid. The

transcript levels are represented by arrows, and variation in the transcript levels is indicated by the different colors of the arrows. For each gene, the transcript level is expressed relative to that of wild-type M callus. (B) Integrated expression patterns of isoprenoid and carotenoid biosynthetic genes in wild-type calli, ECMs and flavedos. Transcript levels are expressed relative to the wild-type M line. All data are presented as means  $\pm$  SE from four genotypes. The ECMs include four representative lines (M-33, RB-4, SBT-6, HQC-2). \* and \*\* indicate that the values of flavedos are significantly different compared with the corresponding callus lines at the significant levels of  $P < 0.05$  and  $P < 0.01$ , respectively.

## Reference

**Cazzonelli C, Pogson B** (2010) Source to sink: regulation of carotenoid biosynthesis in plants. *Trends in Plant Science* **15**, 266-274.

**Chen Y, Li F, Wurtzel ET** (2010) Isolation and characterization of the Z-ISO gene encoding a missing component of carotenoid biosynthesis in plants. *Plant physiology* **153**, 66.

**Farré G, Bai C, Twyman RM, Capell T, Christou P, Zhu C** (2011) Nutritious crops producing multiple carotenoids—a metabolic balancing act. *Trends in Plant Science* **16**, 532-540.

**Fraser PD, Enfissi EM, Halket JM, Truesdale MR, Yu D, Gerrish C, Bramley PM** (2007) Manipulation of phytoene levels in tomato fruit: effects on isoprenoids, plastids, and intermediary metabolism. *Plant Cell* **19**, 3194-3211.

**Lee HS** (2001) Characterization of carotenoids in juice of red navel orange (Cara Cara). *Journal of Agricultural and Food Chemistry* **49**, 2563-2568.

**Liu Q, Xu J, Liu Y, Zhao X, Deng X, Guo L, Gu J** (2007) A novel bud mutation that confers abnormal patterns of lycopene accumulation in sweet orange fruit (*Citrus sinensis* L. Osbeck). *Journal of Experimental Botany* **58**, 4161-4171.

**Vallabhaneni R, Bradbury LMT, Wurtzel ET** (2010) The carotenoid dioxygenase gene family in maize, sorghum, and rice. *Archives of biochemistry and biophysics* **504**, 104-111.

**Xu CJ, Fraser PD, Wang WJ, Bramley PM** (2006) Differences in the carotenoid content of ordinary citrus and lycopene-accumulating mutants. *Journal of Agricultural and Food Chemistry* **54**, 5474-5481.

**Yu Q, Ghisla S, Hirschberg J, Mann V, Beyer P** (2011) Plant carotene *cis-trans* isomerase CRTISO: a new member of the FAD<sub>red</sub>-dependent flavoproteins catalyzing non-redox reactions. *Journal of Biological Chemistry* **286**, 8666.

**Zhu CF, Bai C, Sanahuja G, Yuan DW, Farre G, Naqvi S, Shi LX, Capell T, Christou P** (2010) The regulation of carotenoid pigmentation in flowers. *Archives of Biochemistry and Biophysics* **504**, 132-141.
